# Supplementary material for: A Population Model Evaluating the Consequences of the Evolution of Double-Resistance and Tradeoffs on the Benefits of Two-Drug Antibiotic Treatments
Source: PLoS One. 2014 Jan 31;9(1):e86971. doi: 10.1371/journal.pone.0086971 (PMC3909004; doi:10.1371/journal.pone.0086971)
Supplement: File S1 — (DOC) [file pone.0086971.s004.doc]

**File S1**

**Analytical Solutions**

**NONE**

With no antibiotics, (Equations 1–4) because *S* bacteria do not pay a cost *c*. As a result, *S* increases to a non-zero equilibrium frequency of , while the other infected patients decline to equilibrium frequencies of . To obtain , let = 0, or

(S1)

Because *GS* = *φ*max with no antibiotics (*a* = 0; Equation 6), Equation S1 becomes

(S2)

With the standard parameter values, = 0%.

**CONTROL**

With only antibiotic A and no resistant mutants, === 0. Equation S1 offers again the solution for , except that the presence of the drug lowers *GS* as described by Equation 6. For *a* = 240 and the standard parameter values, *GS* = – 0.25, and = 50%.

**SINGLE**

With antibiotic A and the presence of resistant mutants, achieves to a value greater-than-zero. because *S*, *R*2and *R*3 are more sensitive to the drug. is obtained by setting = 0 (Equation 2), or

(S3)

With the standard parameter values, *G*1 = 0 (Equation 6) and = 27.8%.

**Combined COCKTAIL**

The concentrations *a* = *b* = 120 in our cocktails are sufficiently high that *G*s = *G*1 = *G*2 = *φ*min = –.25 (Equation 7). As *ω* is increased from 0→1, the value of *G*3 = 0 → *φ*min. As a result, if *ω* is below a threshold *θ*, *R*3 dominates,> 0 and . If *ω* is above the threshold, *G*s = *G*1 = *G*2 ≈ *G*3 and *S* dominates because it is the only one that does not pay the cost *c*.

The value of below *θ* is obtained by setting = 0 (Equation 4), or

(S4)

With *ω* = 0, *a* = 120, *b* = 120, and the standard parameter values, *G*3 = 0 (Equation 7) and = 27.8%. If 0 < *ω* < *θ*, Equation S4 is still valid but a new value of *G*3 needs to be determined for each value of *ω*.

The value of for *ω* > *θ* is given by Equation S1 because === 0. However, with the presence of antibiotics *GS* = *φ*min = –.25 (see above) and = 50%, as it was in CONTROL. This solution for holds for all values of *ω* > *θ* because *GS* is not affected by *ω*.

The threshold is obtained by noting that === 0 and *R*3 and *X* are the only types of patients present when *ω* < *θ*. Thus, += 1. As *ω* is increased, the threshold is crossed when *S* is able to invade and > 0, or from Equation 1

(S5)

By combining Equations S4 and S5 and rearranging, the conditions needed for *S* to invade as *ω* is increased becomes

(S6)

With *GS* = *φ*min = –.25 and the standard parameter values,

With *a* = 120 and *b* = 120 in Equation 7, *G*3 ≤ 0.1885 when *ω* ≥ 0.8597, which matches well the numerical estimate *θ* = 0.86 for Combined COCKTAIL in Figure 2.

**Separate COCKTAIL**

A threshold *θ* also exists in Separate COCKTAIL. Our numerical results had shown that *R*3is the only bacterium with a greater than zero equilibrium when *ω* < *θ*. *R*1 and *R*2 are the only ones when *ω* > *θ*.

If *ω* < *θ*, is given by Equation S4 because *S*, *R*1, and *R*2 are not present. With *ω* = 0, *a* = 120, *b* = 120, *MICA*3 = 240, *MICB*3 = 240, and the standard parameter values, and *G*3 = – 0.0833 (Equation 8), and = 37.0%. Equation S4 can be used for other values of *ω* < *θ*, but a new value of *G*3 must be determined each time.

If *ω* > *θ*, is given by Equation S3. For *a* = 120, *b* = 120, and the standard parameter values, *G*1 = – 0.4167 (Equation 8) and =74.1%. Because *G*1 is not affected by *ω*, this solution for is valid for all values of *ω* > *θ*.

The threshold is obtained by starting with *ω* < *θ* and *R*3 as the only bacterium present. If *ω* is increased, there will be a value at which *R*1 and *R*2 first invade. Noting that = 0 and that *R*1 invades when > 0 (Equation 2)

(S7)

Combining Equation S7 and S4 through and rearranging, *R*1 is able to invade as *ω* is increased if

Because *G*1 is not affected by *ω*, its value is fixed at *G*1 = – 0.4167 (see above). By varying *ω* in Equation 8 with the standard parameter values, *G*3 decreases to – 0.4167 when *ω* is increased to 0.75, which matches exactly the threshold identified numerically for Separate COCKTAIL in Figure 2.
